# Supplementary material for: Phase I dose-escalation study of the c-Met tyrosine kinase inhibitor SAR125844 in Asian patients with advanced solid tumors, including patients with MET-amplified gastric cancer
Source: PubMed Central journal article supplement (PMC5668067; doi:10.18632/oncotarget.18554), 2017-06-16
Supplement: oncotarget-08-79546-s001.pdf [file oncotarget-08-79546-s001.pdf]

# Phase I dose-escalation study of the c-Met tyrosine kinase inhibitor SAR125844 in Asian patients with advanced solid tumors, including patients with *MET*-amplified gastric cancer

## SUPPLEMENTARY MATERIALS

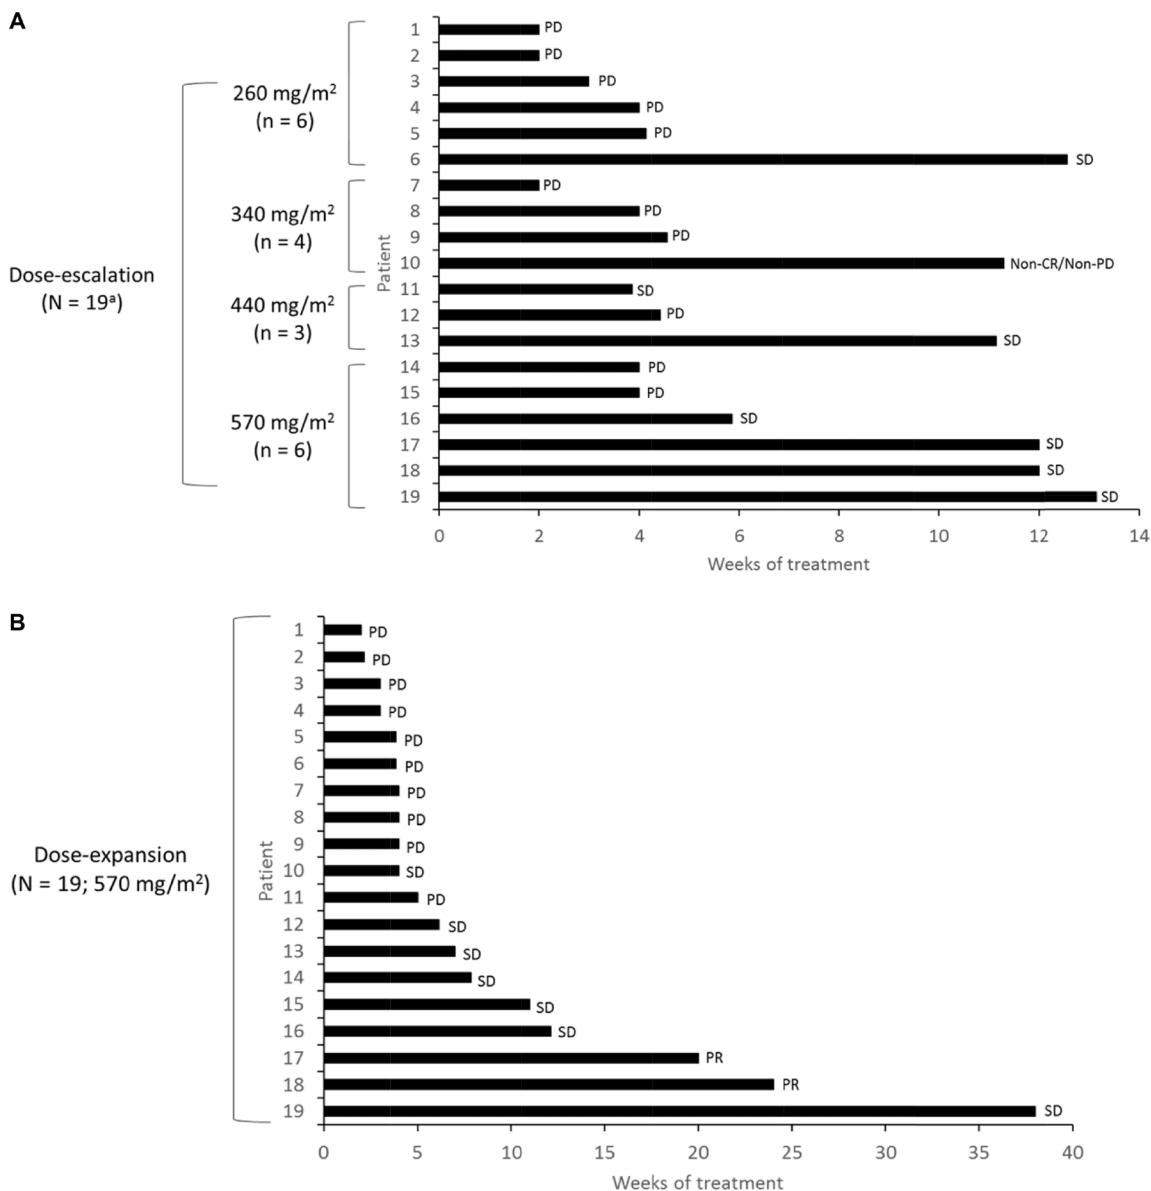

**Supplementary Figure 1:** Duration of treatment and best response for each patient in the (A) dose-escalation and (B) dose-expansion phases. <sup>a</sup>One patient in dose cohort 340 mg/m<sup>2</sup> only had nontarget lesions at baseline. CR = complete response; PD = progression of disease; PR = partial response; SD = stable disease.

**Supplementary Table 1: Total c-Met protein expression (IHC) and respective *MET* amplification in patients in the dose-expansion cohort (*n* = 10)**

| Patient | Total c-Met (percentage of cells with 2+ or 3+ intensity)* | <i>MET</i> amplification (%)** |
|---------|------------------------------------------------------------|--------------------------------|
| 1       | 93                                                         | 11                             |
| 2       | 75                                                         | 26                             |
| 3       | 85                                                         | 16                             |
| 4       | 93                                                         | 90                             |
| 5       | 0                                                          | 10                             |
| 6       | 50                                                         | 78                             |
| 7       | 1                                                          | 45                             |
| 8       | 95                                                         | 86                             |
| 9       | 0                                                          | 11                             |
| 10      | 85                                                         | 95                             |

\*cMet overexpression is defined when there are  $\geq 50\%$  of tumor cells with 2+ or 3+ positive membrane stain on immunohistochemistry (IHC).

\*\**MET* amplification is defined when there are  $\geq 10\%$  of cells with  $> 4$  *MET* gene copies, and a cMET/CEP7 ratio  $\geq 2$  as determined by fluorescence *in situ* hybridization.

**Supplementary Table 2: Summary of study treatment exposure (safety population)**

|                                                                             | Dose in dose-escalation cohort, mg/m <sup>2</sup> |                        |                        |                        | Dose-expansion cohort            |                                    |
|-----------------------------------------------------------------------------|---------------------------------------------------|------------------------|------------------------|------------------------|----------------------------------|------------------------------------|
|                                                                             | 260<br>( <i>N</i> = 6)                            | 340<br>( <i>N</i> = 4) | 440<br>( <i>N</i> = 3) | 570<br>( <i>N</i> = 6) | All patients<br>( <i>N</i> = 19) | Gastric cancer<br>( <i>N</i> = 14) |
| Median treatment duration (range), weeks                                    | 3.5 (2–13)                                        | 4.3 (2–11)             | 4.4 (4–11)             | 8.9 (4–13)             | 4.0 (2–38)                       | 5.6 (2–38)                         |
| Total number of infusions administered (all patients), <i>n</i>             | 27                                                | 21                     | 19                     | 49                     | 157                              | 133                                |
| Total number of infusions administered per patient, median <i>n</i> (range) | 3.5 (2–12)                                        | 4 (2–11)               | 4 (4–11)               | 8.5 (4–12)             | 4 (2–38)                         | 5.5 (2–38)                         |
